# Supplementary material for: Mechanically tunable dry adhesive from wrinkled elastomers
Source: Royal Society of Chemistry journal article supplement (doi:10.1039/b802848f), 2008-01-01
Supplement: b802848f.pdf [file b802848f.pdf]

Supplemental materials for manuscript:

## Mechanically Tunable Dry Adhesive from Wrinkled Elastomers

Pei-Chun Lin,<sup>a,b</sup> Shilpi Vajpayee,<sup>c</sup> Anand Jagota,<sup>\*c</sup> Chung-Yuen Hui,<sup>d</sup> and Shu Yang<sup>\*d</sup>

5

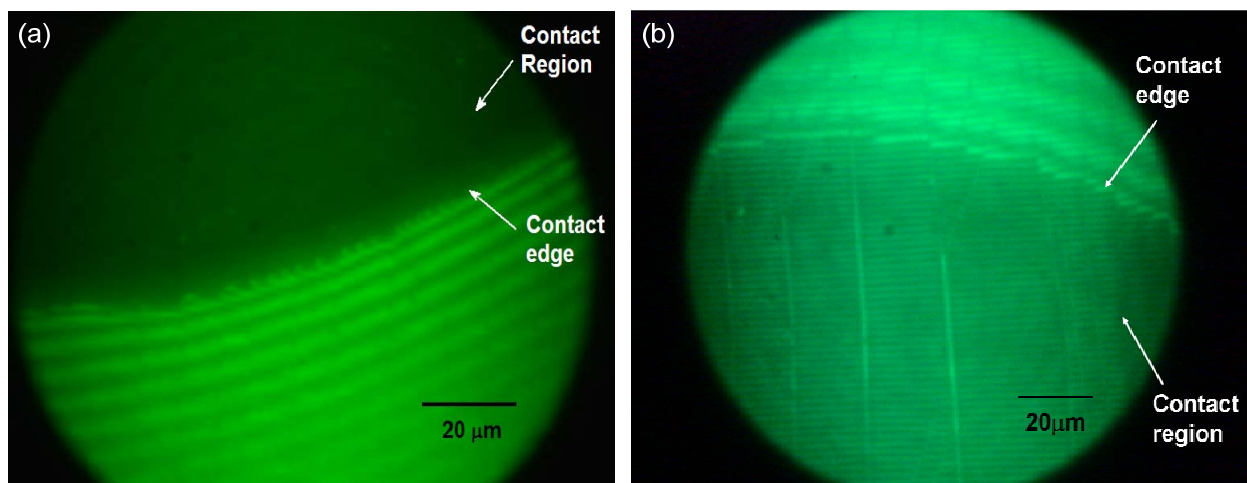

**Fig. S1.** Optical images representing two different scenarios of indentation processes. (a) Ripples are fully flattened as illustrated in Fig. 4a. (b) Ripples are partially flattened as illustrated in Fig. 4c. Note: the waves seen in (a) are not ripples but interference fringes outside the contact, between the top of the PDMS and the glass sphere. Fig. (b) shows both the ripples and the interference fringes (outside the contact).

**M. 1.** Full-length video of the “pick and release” experiment.
